# Supplementary material for: UV mutagenesis and tolerance adaptive laboratory evolution of Pichia fermentans modulate the membrane- bound xylose uptake transporters (XUT) genes for enhanced xylitol production
Source: Research Square preprint supplement (doi:10.21203/rs.3.rs-8818678/v1), 2026-02-18
Supplement: Supplementary file 1 [file 3339be8985ef01e6f003d121.docx]

**UV mutagenesis and tolerance adaptive laboratory evolution of *Pichia fermentans* modulate the membrane-bound xylose uptake transporters (XUT) genes for enhanced xylitol production**

Ramalingam Kayalvizhi1 and Samuel Jacob1*

1Department of Biotechnology, School of Bioengineering, College of Engineering and Technology, Faculty of Engineering and Technology, SRM Institute of Science and Technology, SRM Nagar, Chengalpattu Dist., Kattankulathur - 603203, Tamil Nadu, India

***Corresponding author:** [samueljb@srmist.edu.in](mailto:samueljb@srmist.edu.in)

**Table S1** Composition of the fermentation medium

| **Media components** | **Quantity (g/L)** |
| --- | --- |
| Xylose | 100 |
| Peptone | 20 |
| Yeast extract | 10 |
| Potassium dihydrogen phosphate | 0.5 |
| Ammonium sulphate | 0.5 |
| Magnesium sulphate | 0.5 |

**Table S2** Fermentation kinetics parameters from experimental data of xylitol production using UV-irradiated strains of *P. fermentans*

| **Fermentation kinetic parameters** | **Unit** | **Xylitol produced by UV-irradiated strains of *P. fermentans*** | | | | |
| --- | --- | --- | --- | --- | --- | --- |
| **UV1C** | **UV2C** | **UV3C** | **UV4C** | **UV5C** |
| **Cell biomass** | | | | | | |
| Maximum cell biomass concentration | g/L | 27.42 ± 0.18 | 28.28 ± 0.50 | 30.82 ± 0.43 | 28.07 ± 0.31 | 24.92 ± 0.33 |
| Yield coefficient of cell biomass (Yx/s) | g cell biomass/g substrate | 0.39 ± N.D. | 0.39 ± N.D. | 0.42 ± 0.01 | 0.42 ± 0.01 | 0.41 ± 0.01 |
| **Xylose (substrate)** | | | | | | |
| Xylose uptake efficiency | % | 63.44 ± 0.91 | 71.77 ± 0.73 | 73.56 ± 0.29 | 65.78 ± 1.36 | 59.64 ± 0.97 |
| Maximum xylose consumption rate | g/L.h | 0.77 ± N.D. | 0.85 ± 0.01 | 0.94 ± N.D. | 0.84 ± 0.02 | 0.76 ± 0.01 |
| **Xylitol (product)** | | | | | | |
| Maximum xylitol concentration | g/L | 32.33 ± 0.42 | 37.60 ± 0.28 | 41.3 ± 0.67 | 32.67 ± 0.56 | 26.13 ± 0.45 |
| Xylitol productivity | g/L.h | 0.36 ± N.D. | 0.45 ± N.D. | 0.53 ± 0.01 | 0.42 ± 0.01 | 0.34 ± 0.01 |
| Xylitol yield | g xylitol/g xylose | 0.47 ± N.D. | 0.53 ± N.D. | 0.56 ± 0.01 | 0.49 ± 0.02 | 0.44 ± 0.01 |
| Fermentation efficiency | % | 51.00 ± 0.47 | 57.58 ± 0.51 | 61.69 ± 1.22 | 54.67 ± 2.00 | 48.16 ± 0.78 |

The experiment was performed in triplicate and data were represented as mean ± SD (N.D. negligible deviation)

**Table S3** Comparison of xylitol yields in yeast strains after physical and chemical mutagenesis

| **Yeast** | **Method of Mutagenesis** | **Xylitol yield (g/g of xylose)** | | **Fold increase** | **Reference** |
| --- | --- | --- | --- | --- | --- |
| **Wild-type** | **Mutant strain** |
| *Pichia fermentans* | Chemical mutagen -Ethyl methane sulfonate | 0.45 | 0.68 | 1.51 | Prabhu et al., (2020) |
| *Candida tropicalis* | UV irradiation | 0.77 | 0.81 | 1.05 | Rao Ravella sreenivas et al., (2006) |
| UV irradiation followed by N-Methyl-N’-nitro-N-nitrosoguanidine exposure | 0.77 | 0.87 | 1.13 |
| *Candida tropicalis* | Chemical mutagen - Ethyl methane sulfonate | 0.48 | 0.83 | 1.73 | Singh et al., (2023) |
| *Kluyveromyces marxianus* | Chemical mutagen - Ethyl methane sulfonate | 0.48 | 0.67 | 1.40 | Kim et al., (2015) |
| *Pichia fermentans* | UV irradiation | 0.38 | 0.61 | 1.61 | This study |


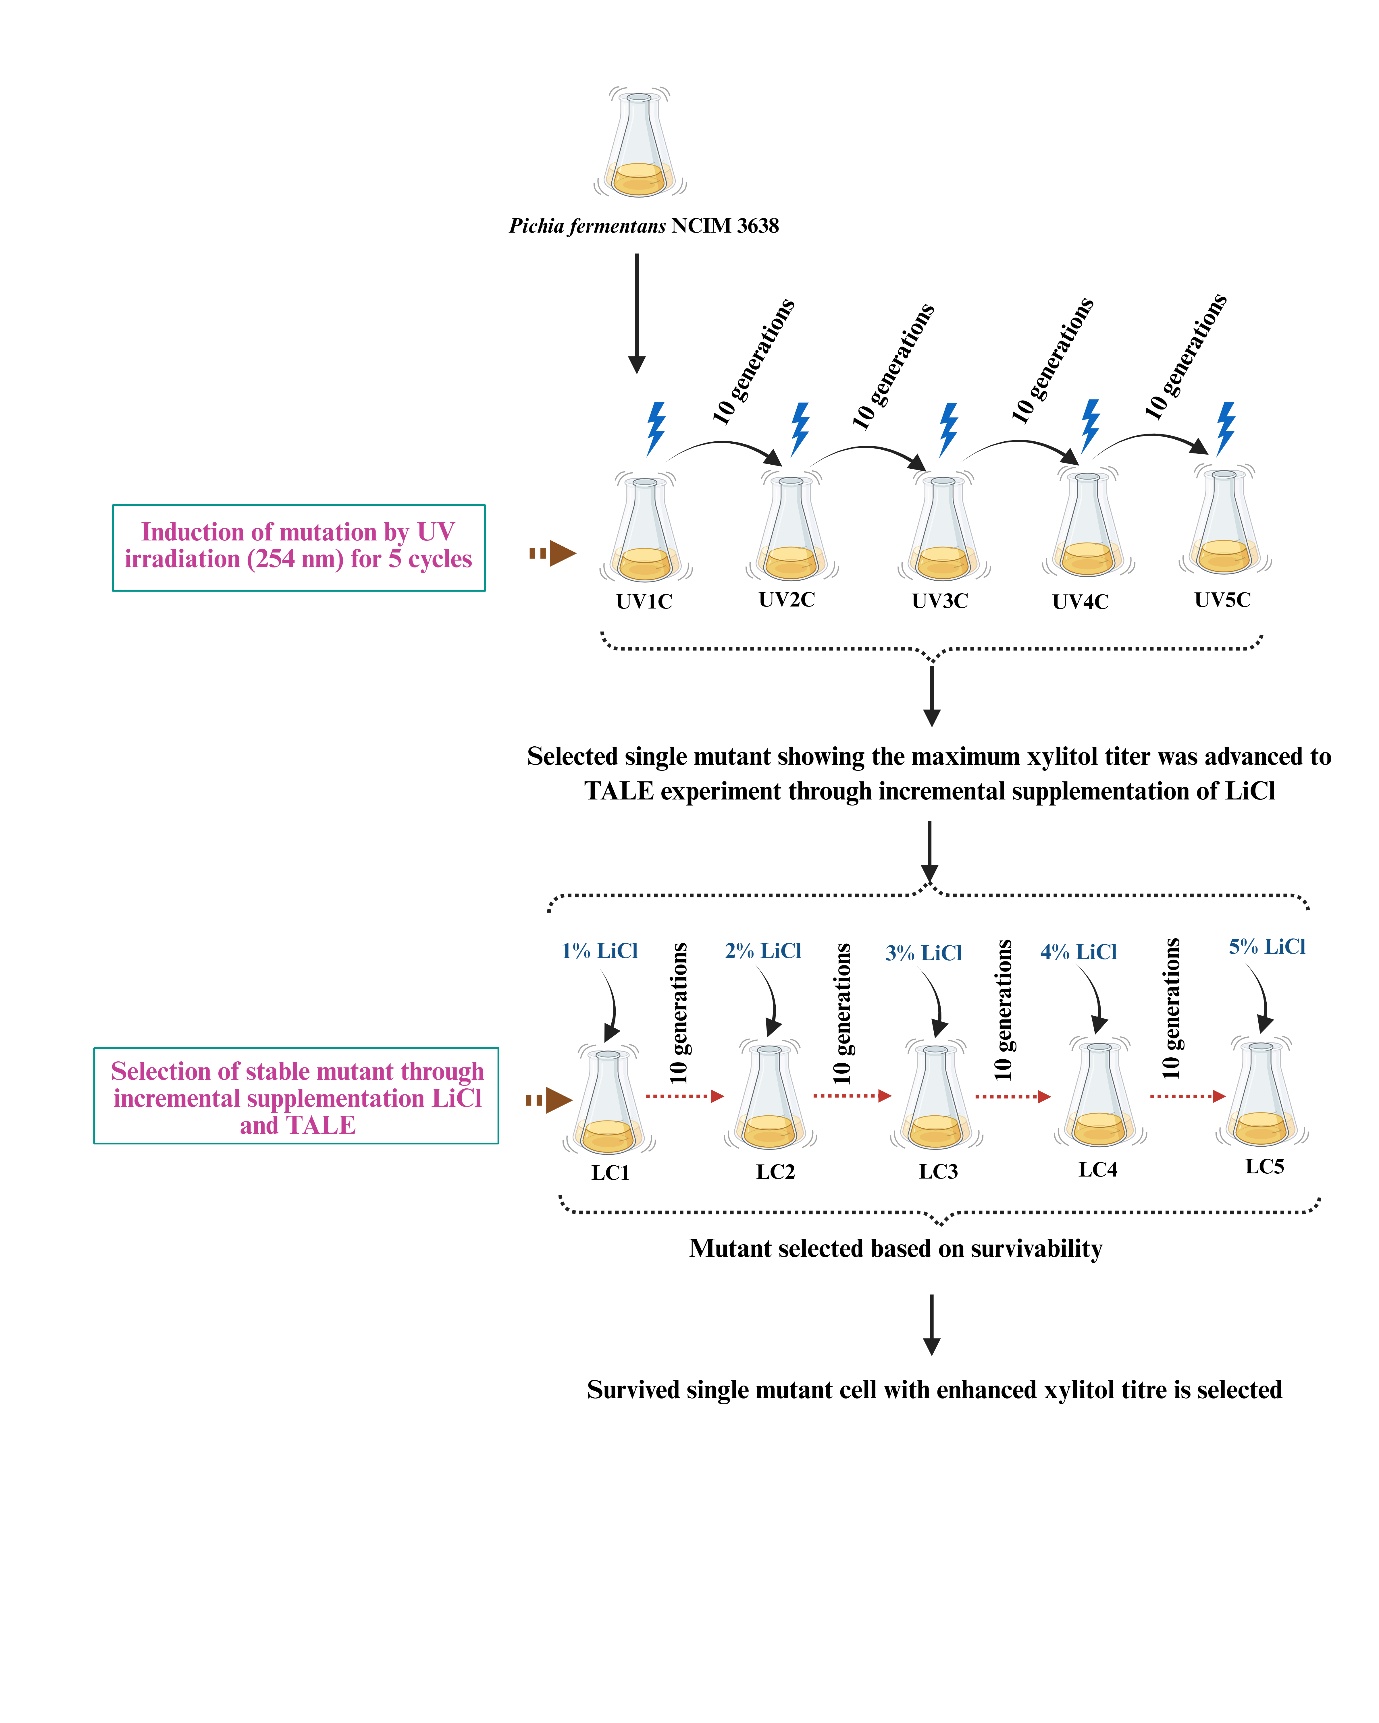


**Fig. S1.** Schematic representation of the methodology of UV mutagenesis and LiCl-based TALE in *P. fermentans* NCIM 3638


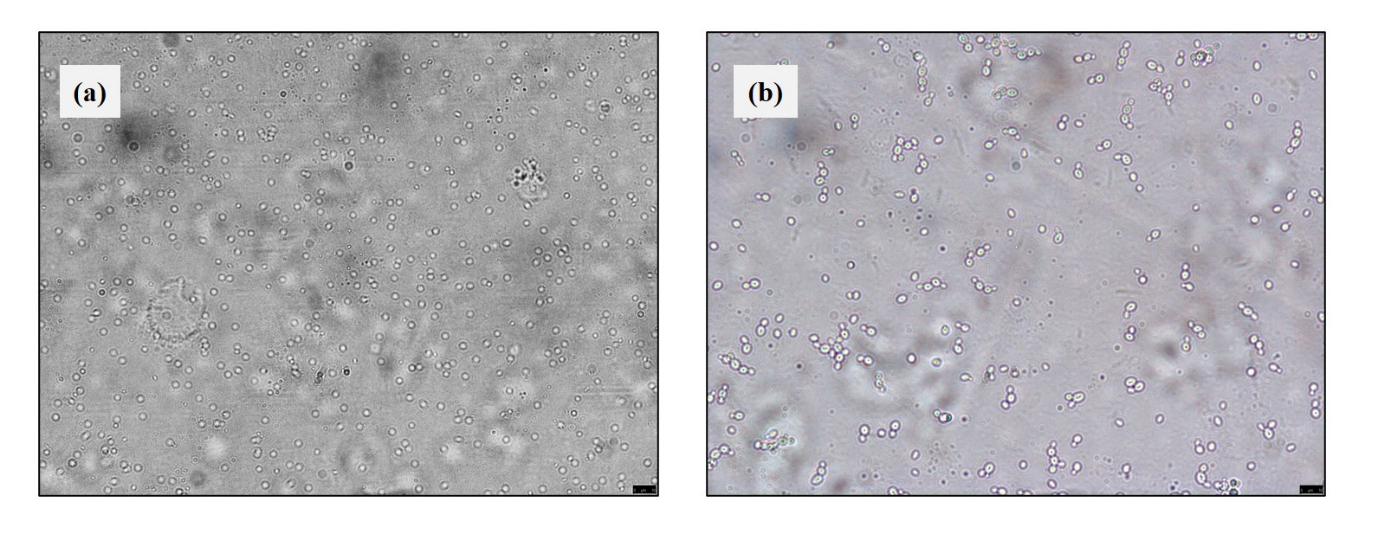


**Fig. S2.** Bright field microscopic images of *Pichia fermentans* (a) Wild-type (b) KS-MUT9


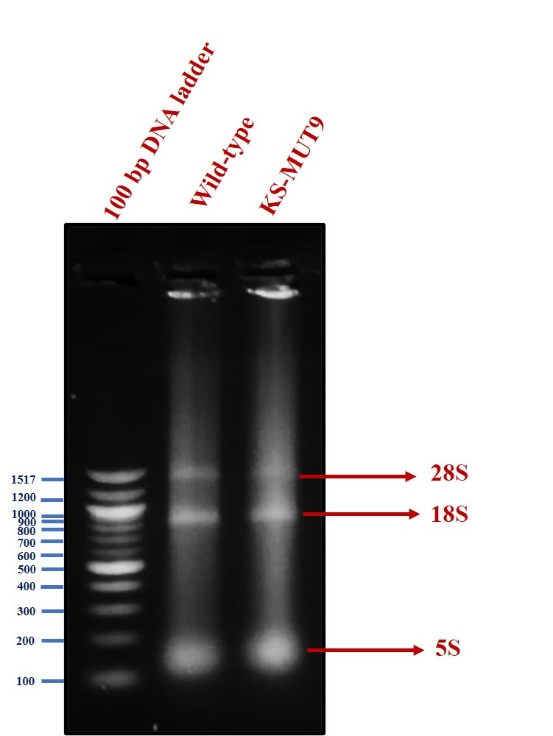


**Fig. S3.** Agarose gel electrophoresis of total RNA isolated from wild-type and mutant KS-MUT9 strains of *Pichia fermentans*


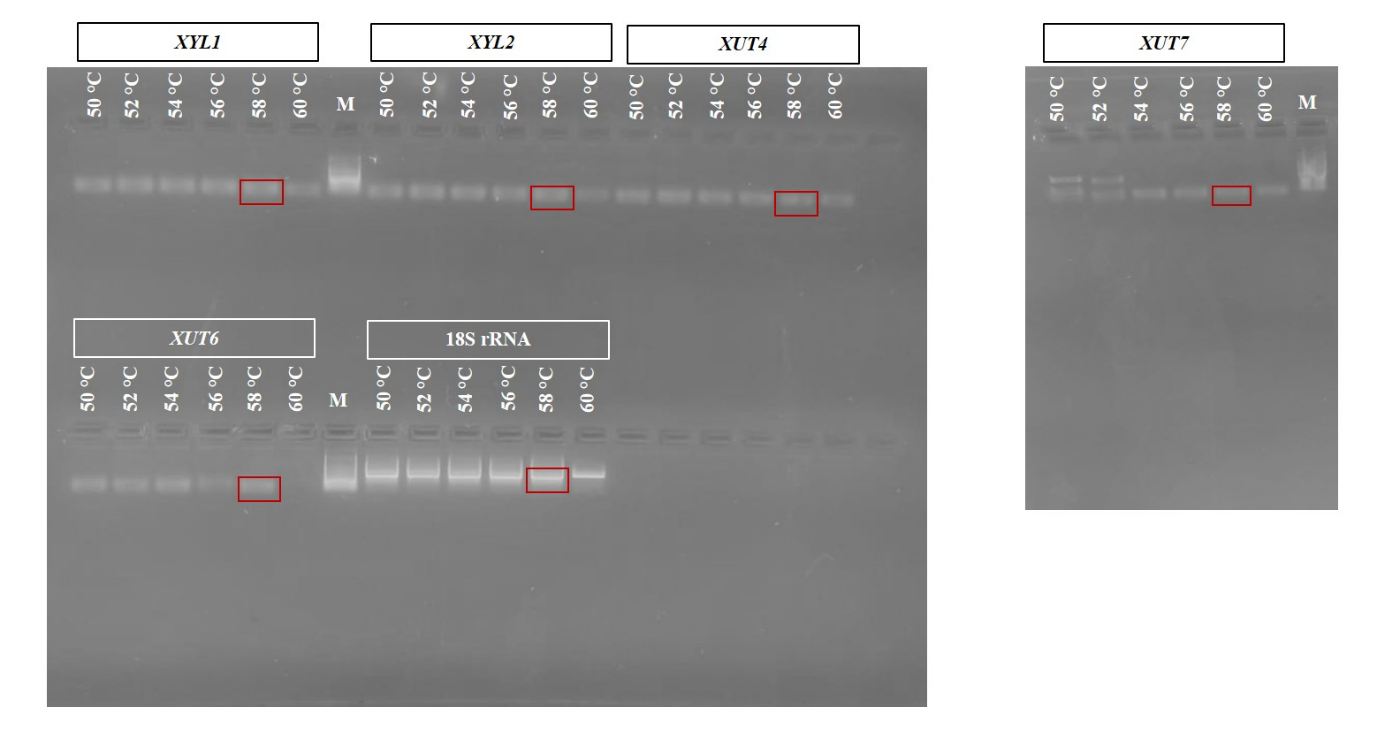


**Fig. S4.** Gradient PCR optimization of primers targeting *XYL1, XYL2, XUT4, XUT6, XUT7,* and *18S rRNA* genes in Pichia fermentans NCIM 3638 at annealing temperatures of 50–60 °C. PCR products were analyzed by agarose gel electrophoresis. ***M** - DNA marker; red boxes indicate optimal annealing temperatures.


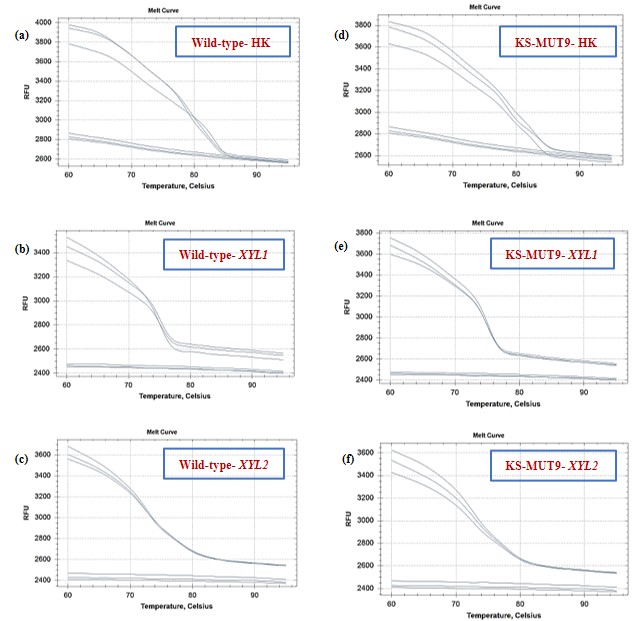


**Fig. S5.** Melt curve of real-time PCR SYBR assay of relative gene expression of xylose metabolizing gene *XYL1* and xylitol metabolizing gene *XYL2* in wild-type and mutant KS-MUT9 strains of *Pichia fermentans*. *HK- Reference gene (18S rRNA)


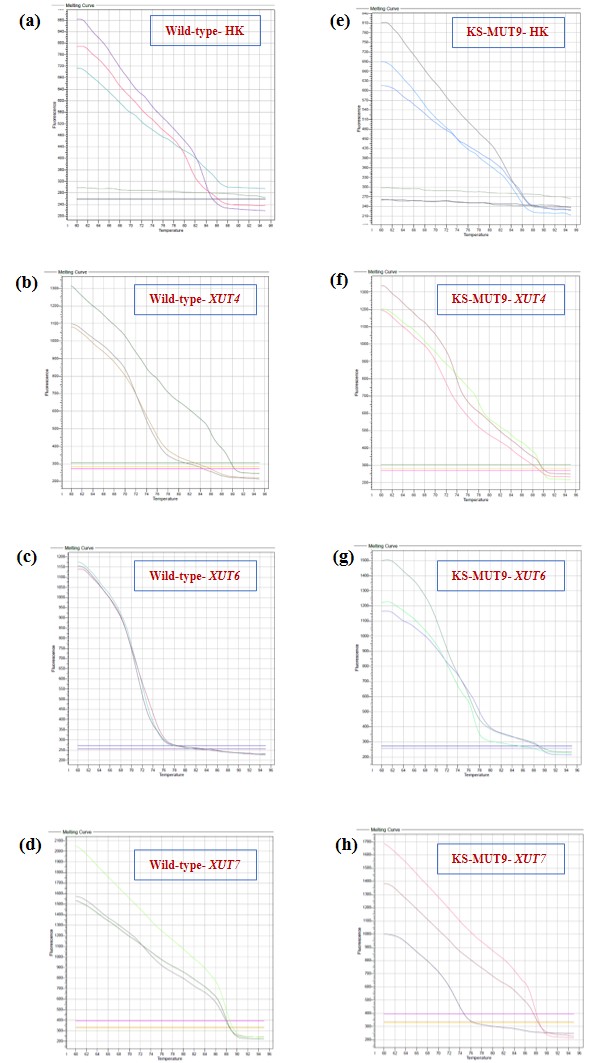


**Fig. S6.** Melt curve of real-time PCR SYBR assay of relative gene expression of xylose transporter genes (*XUT4, XUT6 and XUT7*) in wild-type and mutant KS-MUT9 strains of *Pichia fermentans*. *HK- Reference gene (18S rRNA)


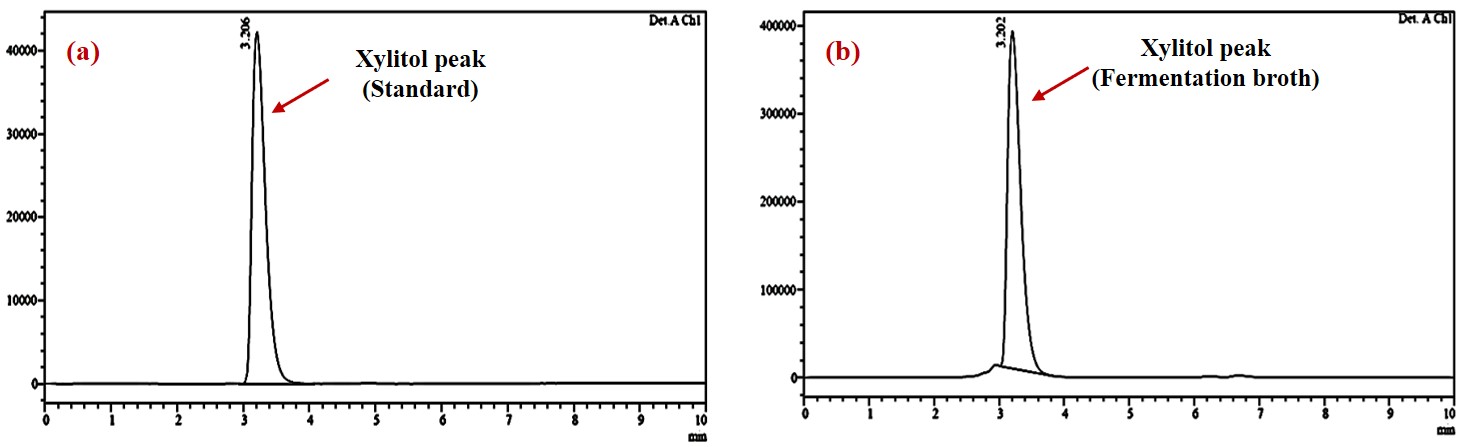


**Fig. S7.** HPLC chromatogram showing xylitol in the (a) standard and (b) fermentation broth of mutant KS-MUT9 strain. *Red arrow points the xylitol peak

**Fermentation kinetics equations**

(Eq. S1)

(Eq. S2)

(Eq. S3)

(Eq. S4)

(Eq. S5)

(Eq. S6)

(Eq. S7)

where YX/S (g cell biomass produced/g xylose consumed) represents the yield coefficient for cell biomass; ΔX represents the change in cell biomass concentration (g/L); X0 and Xf represent the initial and final cell biomass concentration (g/L); ΔS represents the change in xylose concentration (g/L); S0 and Sf represent the initial and final xylose concentration (g/L); t represents fermentation time (h); YP/S (g xylitol produced/g xylose consumed) represents the yield coefficient for xylitol production; ΔP represents the change in concentration of xylitol (g/L); P0 and Pf represent the initial and final xylitol concentration (g/L).
